# Supplementary material for: Polymorphisms in Autophagy-Related Gene IRGM Are Associated with Susceptibility to Autoimmune Thyroid Diseases
Source: Hindawi journal article supplement (doi:10.1155/2018/7959707), 2018-06-11
Supplement: f1 [file 7959707.f1.pdf]

Supplementary table 1. Previous genetic studies on inflammation and cytokine related genes in AITD performed by our team

| Gene   | Loci       | cases | Controls | Association |           |                         |
|--------|------------|-------|----------|-------------|-----------|-------------------------|
|        |            |       |          | AITD (P)    | GD (P)    | HT (P)                  |
| IL-37  | rs3811046  | 1002  | 939      | - (0.455)   | - (0.062) | - (0.217)               |
|        | rs3811047  |       |          | - (0.416)   | - (0.052) | - (0.210)               |
|        | rs2723176  |       |          | + (0.044)   | + (0.014) | - (0.655)               |
|        | rs2723186  |       |          | - (0.835)   | + (0.014) | - (0.685)               |
| IL-17A | rs2275913  | 508   | 224      | - (0.930)   | - (0.862) | - (0.941)               |
|        | rs8193037  |       |          | - (0.968)   | - (0.985) | - (0.840)               |
|        | rs3819025  |       |          | + (0.000)   | + (0.011) | - (0.774)               |
| IL-17F | rs763780   | 508   | 224      | + (0.000)   | + (0.002) | + (0.001)               |
| IL-21  | rs907715   | 633   | 242      | - (0.678)   | - (0.963) | - (0.497)               |
|        | rs4833837  |       |          | - (0.413)   | - (0.606) | - (0.340)               |
|        | rs2221903  |       |          | - (0.001)   | + (0.018) | + (0.009)               |
|        | rs2055979  |       |          | - (0.658)   | - (0.782) | - (0.458)               |
| IL-21R | rs3093301  | 633   | 242      | - (0.606)   | - (0.752) | - (0.138)               |
|        | rs2285452  |       |          | - (0.359)   | - (0.797) | - (0.068)               |
| IL -22 | rs2046068  | 975   | 851      | - (0.278)   | - (0.729) | + (0.027 <sup>*</sup> ) |
|        | rs2227478  |       |          | - (0.339)   | - (0.790) | + (0.031 <sup>*</sup> ) |
|        | rs2227485  |       |          | - (0.341)   | - (0.598) | - (0.232)               |
|        | rs1179251  |       |          | - (0.901)   | - (0.965) | + (0.007 <sup>*</sup> ) |
|        | rs11611206 |       |          | + (0.596)   | - (0.364) | + (0.765)               |

(P, P value of comparison of allele distributions between cases and controls; \*, P value of comparison of allele distributions between male cases and male controls; AITD, autoimmune thyroid diseases; GD, Graves' disease; HT, Hashimoto's thyroiditis)
